# Supplementary material for: How Do Football Playing Positions Differ in Body Composition? A First Insight into White Italian Serie A and Serie B Players
Source: MDPI journal article supplement (doi:10.3390/jfmk8020080), 2023-06-15
Supplement: s1 [file s1]

# Supplementary material

## S1. Post-hoc analysis

**Table S1.** Height differences. Only statistically significant differences are reported.

| group1 | group2 | difference | p-value | CI lower | CI upper |
|--------|--------|------------|---------|----------|----------|
| CF     | ES     | -8.40      | 0.001   | -11.08   | -5.73    |
| CF     | MID    | -7.87      | 0.001   | -10.69   | -5.05    |
| CF     | WM     | -4.25      | 0.001   | -6.78    | -1.77    |
| CF     | FB     | -6.13      | 0.001   | -8.61    | -3.66    |
| CF     | SS     | -10.25     | 0.001   | -13.12   | -7.31    |
| CF     | AM     | -5.94      | 0.001   | -8.78    | -3.10    |
| ES     | WM     | 4.16       | 0.001   | 1.60     | 6.71     |
| ES     | CB     | 8.62       | 0.001   | 6.18     | 11.07    |
| ES     | GK     | 9.81       | 0.001   | 7.17     | 12.46    |
| MID    | WM     | 3.62       | 0.001   | 0.92     | 6.32     |
| MID    | CB     | 8.09       | 0.001   | 5.49     | 10.68    |
| MID    | GK     | 9.28       | 0.001   | 6.49     | 12.06    |
| WM     | CB     | 4.46       | 0.001   | 2.18     | 6.74     |
| WM     | GK     | 5.66       | 0.001   | 3.16     | 8.15     |
| WM     | SS     | -6.01      | 0.001   | -8.84    | -3.18    |
| CB     | FB     | -6.35      | 0.001   | -8.57    | -4.13    |
| CB     | SS     | -10.47     | 0.001   | -13.20   | -7.74    |
| CB     | AM     | -6.16      | 0.001   | -8.78    | -3.54    |
| CB     | WM     | -4.12      | 0.001   | -6.91    | -1.34    |
| GK     | SS     | -11.66     | 0.001   | -14.57   | -8.75    |
| GK     | AM     | -7.35      | 0.001   | -10.16   | -4.55    |
| SS     | AM     | 4.31       | 0.001   | 1.20     | 7.42     |

GK = goalkeeper, CB = central back, FB = fullback, MID = midfielder, WM = wide midfielder, AM = attacking midfielder, SS = second striker, ES = external strikers, CF = striker.

**Table S2.** Weight differences. Only statistically significant differences are reported.

| group1 | group2 | difference | p-value | CI lower | CI upper |
|--------|--------|------------|---------|----------|----------|
| CF     | ES     | -10.91     | 0.001   | -13.86   | -7.96    |
| CF     | MID    | -7.78      | 0.001   | -10.88   | -4.67    |
| CF     | WM     | -6.20      | 0.001   | -8.98    | -3.41    |
| CF     | FB     | -7.25      | 0.001   | -9.98    | -4.53    |
| CF     | SS     | -8.82      | 0.001   | -12.06   | -5.58    |
| CF     | AM     | -6.75      | 0.001   | -9.88    | -3.63    |
| ES     | MID    | 3.13       | 0.050   | 0.00     | 6.26     |
| ES     | WM     | 4.71       | 0.001   | 1.90     | 7.53     |
| ES     | CB     | 10.21      | 0.001   | 7.52     | 12.90    |
| ES     | FB     | 3.66       | 0.001   | 0.90     | 6.41     |
| ES     | GK     | 12.06      | 0.001   | 9.15     | 14.97    |
| ES     | AM     | 4.15       | 0.002   | 1.00     | 7.30     |
| MID    | CB     | 7.08       | 0.001   | 4.22     | 9.94     |
| MID    | GK     | 8.93       | 0.001   | 5.86     | 11.99    |
| WM     | CB     | 5.50       | 0.001   | 2.99     | 8.01     |
| WM     | GK     | 7.35       | 0.001   | 4.60     | 10.09    |
| CB     | FB     | -6.56      | 0.001   | -9.00    | -4.11    |
| CB     | SS     | -8.12      | 0.001   | -11.13   | -5.12    |
| CB     | AM     | -6.06      | 0.001   | -8.94    | -3.18    |
| FB     | GK     | 8.40       | 0.001   | 5.72     | 11.09    |
| GK     | SS     | -9.97      | 0.001   | -13.17   | -6.76    |
| GK     | AM     | -7.91      | 0.001   | -10.99   | -4.82    |

GK = goalkeeper, CB = central back, FB = fullback, MID = midfielder, WM = wide midfielder, AM = attacking midfielder, SS = second striker, ES = external strikers, CF = striker.

**Table S3.** PhA differences. Only statistically significant differences are reported.

| group1 | group2 | difference | p-value | CI lower | CI upper |
|--------|--------|------------|---------|----------|----------|
| AM     | MID    | 0.47       | 0.01    | 0.06     | 0.89     |
| ES     | GK     | -0.37      | 0.05    | -0.74    | 0.00     |
| FB     | GK     | -0.35      | 0.04    | -0.69    | -0.01    |
| GK     | MID    | 0.48       | 0.00    | 0.09     | 0.86     |
| GK     | SS     | 0.43       | 0.03    | 0.02     | 0.83     |

goalkeeper = GK, central back = CB, fullback = FB, midfielder = MID, wide midfielder = WM, attacking midfielder = AM, second striker = SS, external strikers = ES, and striker - CF

**Table S4.** TBW differences. Only statistically significant differences are reported.

| group1 | group2 | difference | p-value | CI lower | CI upper |
|--------|--------|------------|---------|----------|----------|
| AM     | CB     | 3.50       | 0.00    | 1.85     | 5.14     |
| AM     | ES     | -2.50      | 0.00    | -4.30    | -0.71    |
| AM     | GK     | 4.47       | 0.00    | 2.71     | 6.23     |
| AM     | CF     | 3.86       | 0.00    | 2.08     | 5.64     |
| CB     | ES     | -6.00      | 0.00    | -7.53    | -4.47    |
| CB     | FB     | -3.46      | 0.00    | -4.85    | -2.06    |
| CB     | MID    | -3.95      | 0.00    | -5.58    | -2.32    |
| CB     | SS     | -4.73      | 0.00    | -6.44    | -3.02    |
| CB     | WM     | -3.09      | 0.00    | -4.52    | -1.66    |
| ES     | FB     | 2.54       | 0.00    | 0.98     | 4.11     |
| ES     | GK     | 6.97       | 0.00    | 5.32     | 8.63     |
| ES     | MID    | 2.05       | 0.01    | 0.27     | 3.83     |
| ES     | CF     | 6.36       | 0.00    | 4.68     | 8.04     |
| ES     | WM     | 2.91       | 0.00    | 1.31     | 4.52     |
| FB     | GK     | 4.43       | 0.00    | 2.90     | 5.96     |
| FB     | CF     | 3.82       | 0.00    | 2.26     | 5.37     |
| GK     | MID    | -4.92      | 0.00    | -6.67    | -3.18    |
| GK     | SS     | -5.70      | 0.00    | -7.53    | -3.88    |
| GK     | WM     | -4.06      | 0.00    | -5.62    | -2.50    |
| MID    | CF     | 4.31       | 0.00    | 2.54     | 6.08     |
| SS     | CF     | 5.09       | 0.00    | 3.24     | 6.93     |
| CF     | WM     | -3.45      | 0.00    | -5.03    | -1.86    |

goalkeeper = GK, central back = CB, fullback = FB, midfielder = MID, wide midfielder = WM, attacking  
midfielder = AM, second striker = SS, external strikers = ES, and striker - CF

**Table S5.** ECW differences. Only statistically significant differences are reported.

| group1 | group2 | difference | p-value | CI lower | CI upper |
|--------|--------|------------|---------|----------|----------|
| AM     | CB     | 1.29       | 0.00    | 0.64     | 1.94     |
| AM     | ES     | -1.14      | 0.00    | -1.85    | -0.43    |
| AM     | GK     | 1.71       | 0.00    | 1.02     | 2.41     |
| AM     | CF     | 1.37       | 0.00    | 0.67     | 2.08     |
| CB     | ES     | -2.43      | 0.00    | -3.04    | -1.82    |
| CB     | FB     | -1.37      | 0.00    | -1.92    | -0.82    |
| CB     | MID    | -1.63      | 0.00    | -2.27    | -0.98    |
| CB     | SS     | -1.94      | 0.00    | -2.62    | -1.26    |
| CB     | WM     | -1.18      | 0.00    | -1.75    | -0.62    |
| ES     | FB     | 1.06       | 0.00    | 0.44     | 1.68     |
| ES     | GK     | 2.85       | 0.00    | 2.20     | 3.51     |
| ES     | MID    | 0.80       | 0.01    | 0.09     | 1.51     |
| ES     | CF     | 2.51       | 0.00    | 1.85     | 3.18     |
| ES     | WM     | 1.25       | 0.00    | 0.61     | 1.88     |
| FB     | GK     | 1.79       | 0.00    | 1.19     | 2.40     |
| FB     | CF     | 1.45       | 0.00    | 0.84     | 2.07     |
| GK     | MID    | -2.05      | 0.00    | -2.74    | -1.36    |
| GK     | SS     | -2.36      | 0.00    | -3.08    | -1.64    |
| GK     | WM     | -1.61      | 0.00    | -2.23    | -0.99    |
| MID    | CF     | 1.71       | 0.00    | 1.01     | 2.41     |
| SS     | CF     | 2.02       | 0.00    | 1.29     | 2.75     |
| SS     | WM     | 0.75       | 0.03    | 0.05     | 1.46     |
| CF     | WM     | -1.27      | 0.00    | -1.90    | -0.64    |

goalkeeper = GK, central back = CB, fullback = FB, midfielder = MID, wide midfielder = WM, attacking  
midfielder = AM, second straiiker = SS, external strikers = ES, and striker - CF

**Table S6.** ICW differences. Only statistically significant differences are reported.

| group1 | group2 | difference | p-value | CI lower | CI upper |
|--------|--------|------------|---------|----------|----------|
| AM     | CB     | 2.21       | 0.00    | 1.19     | 3.22     |
| AM     | ES     | -1.37      | 0.00    | -2.48    | -0.25    |
| AM     | GK     | 2.76       | 0.00    | 1.67     | 3.85     |
| AM     | CF     | 2.48       | 0.00    | 1.38     | 3.59     |
| CB     | ES     | -3.57      | 0.00    | -4.52    | -2.62    |
| CB     | FB     | -2.09      | 0.00    | -2.95    | -1.22    |
| CB     | MID    | -2.32      | 0.00    | -3.33    | -1.31    |
| CB     | SS     | -2.79      | 0.00    | -3.86    | -1.73    |
| CB     | WM     | -1.90      | 0.00    | -2.79    | -1.02    |
| ES     | FB     | 1.49       | 0.00    | 0.51     | 2.46     |
| ES     | GK     | 4.12       | 0.00    | 3.09     | 5.15     |
| ES     | MID    | 1.25       | 0.01    | 0.14     | 2.35     |
| ES     | CF     | 3.85       | 0.00    | 2.81     | 4.89     |
| ES     | WM     | 1.67       | 0.00    | 0.67     | 2.66     |
| FB     | GK     | 2.64       | 0.00    | 1.69     | 3.58     |
| FB     | CF     | 2.36       | 0.00    | 1.40     | 3.32     |
| GK     | MID    | -2.87      | 0.00    | -3.96    | -1.79    |
| GK     | SS     | -3.34      | 0.00    | -4.48    | -2.21    |
| GK     | WM     | -2.45      | 0.00    | -3.42    | -1.48    |
| MID    | CF     | 2.60       | 0.00    | 1.50     | 3.70     |
| SS     | CF     | 3.07       | 0.00    | 1.92     | 4.21     |
| CF     | WM     | -2.18      | 0.00    | -3.16    | -1.20    |

goalkeeper = GK, central back = CB, fullback = FB, midfielder = MID, wide midfielder = WM, attacking  
midfielder = AM, second striker = SS, external strikers = ES, and striker - CF

**Table S7.** FFM differences. Only statistically significant differences are reported.

| group1 | group2 | difference | p-value | CI lower | CI upper |
|--------|--------|------------|---------|----------|----------|
| AM     | CB     | 5.13       | 0.00    | 2.70     | 7.57     |
| AM     | ES     | -3.70      | 0.00    | -6.36    | -1.04    |
| AM     | GK     | 6.54       | 0.00    | 3.93     | 9.15     |
| AM     | CF     | 5.65       | 0.00    | 3.01     | 8.29     |
| CB     | ES     | -8.83      | 0.00    | -11.10   | -6.56    |
| CB     | FB     | -5.00      | 0.00    | -7.07    | -2.94    |
| CB     | MID    | -5.77      | 0.00    | -8.19    | -3.36    |
| CB     | SS     | -6.95      | 0.00    | -9.49    | -4.41    |
| CB     | WM     | -4.51      | 0.00    | -6.63    | -2.39    |
| ES     | FB     | 3.83       | 0.00    | 1.50     | 6.15     |
| ES     | GK     | 10.24      | 0.00    | 7.78     | 12.70    |
| ES     | MID    | 3.06       | 0.01    | 0.42     | 5.70     |
| ES     | CF     | 9.35       | 0.00    | 6.86     | 11.84    |
| ES     | WM     | 4.32       | 0.00    | 1.94     | 6.70     |
| FB     | GK     | 6.41       | 0.00    | 4.15     | 8.68     |
| FB     | CF     | 5.52       | 0.00    | 3.22     | 7.83     |
| GK     | MID    | -7.18      | 0.00    | -9.77    | -4.59    |
| GK     | SS     | -8.36      | 0.00    | -11.07   | -5.65    |
| GK     | WM     | -5.92      | 0.00    | -8.24    | -3.60    |
| MID    | CF     | 6.29       | 0.00    | 3.67     | 8.91     |
| SS     | CF     | 7.47       | 0.00    | 4.73     | 10.21    |
| CF     | WM     | -5.03      | 0.00    | -7.39    | -2.68    |

goalkeeper = GK, central back = CB, fullback = FB, midfielder = MID, wide midfielder = WM, attacking  
midfielder = AM, second striker = SS, external strikers = ES, and striker - CF

**Table S8.** FM differences. Only statistically significant differences are reported.

| group1 | group2 | difference | p-value | CI lower | CI upper |
|--------|--------|------------|---------|----------|----------|
| AM     | GK     | 1.37       | 0.04    | 0.03     | 2.70     |
| CB     | ES     | -1.38      | 0.01    | -2.54    | -0.22    |
| CB     | FB     | -1.55      | 0.00    | -2.61    | -0.50    |
| CB     | MID    | -1.31      | 0.03    | -2.54    | -0.08    |
| ES     | GK     | 1.82       | 0.00    | 0.56     | 3.08     |
| ES     | CF     | 1.56       | 0.00    | 0.28     | 2.83     |
| FB     | GK     | 1.99       | 0.00    | 0.83     | 3.15     |
| FB     | CF     | 1.73       | 0.00    | 0.55     | 2.90     |
| GK     | MID    | -1.75      | 0.00    | -3.07    | -0.43    |
| GK     | SS     | -1.61      | 0.01    | -2.99    | -0.23    |
| GK     | WM     | -1.43      | 0.01    | -2.61    | -0.24    |
| MID    | CF     | 1.49       | 0.02    | 0.15     | 2.83     |

goalkeeper = GK, central back = CB, fullback = FB, midfielder = MID, wide midfielder = WM, attacking midfielder = AM, second striker = SS, external strikers = ES, and striker - CF



**Table S9.** ALST differences. Only statistically significant differences are reported.

| group1 | group2 | difference | p-value | CI lower | CI upper |
|--------|--------|------------|---------|----------|----------|
| AM     | CB     | 0.75       | 0.00    | 0.40     | 1.09     |
| AM     | ES     | -0.39      | 0.04    | -0.77    | -0.01    |
| AM     | GK     | 0.90       | 0.00    | 0.53     | 1.28     |
| AM     | CF     | 0.82       | 0.00    | 0.44     | 1.20     |
| CB     | ES     | -1.14      | 0.00    | -1.46    | -0.81    |
| CB     | FB     | -0.63      | 0.00    | -0.93    | -0.34    |
| CB     | MID    | -0.74      | 0.00    | -1.08    | -0.39    |
| CB     | SS     | -0.96      | 0.00    | -1.32    | -0.59    |
| CB     | WM     | -0.60      | 0.00    | -0.90    | -0.29    |
| ES     | FB     | 0.51       | 0.00    | 0.17     | 0.84     |
| ES     | GK     | 1.29       | 0.00    | 0.94     | 1.65     |
| ES     | MID    | 0.40       | 0.03    | 0.02     | 0.78     |
| ES     | CF     | 1.21       | 0.00    | 0.85     | 1.57     |
| ES     | WM     | 0.54       | 0.00    | 0.20     | 0.88     |
| FB     | GK     | 0.79       | 0.00    | 0.46     | 1.11     |
| FB     | CF     | 0.71       | 0.00    | 0.38     | 1.04     |
| GK     | MID    | -0.89      | 0.00    | -1.26    | -0.52    |
| GK     | SS     | -1.11      | 0.00    | -1.50    | -0.73    |
| GK     | WM     | -0.75      | 0.00    | -1.09    | -0.42    |
| MID    | CF     | 0.81       | 0.00    | 0.43     | 1.19     |
| SS     | CF     | 1.03       | 0.00    | 0.64     | 1.42     |
| CF     | WM     | -0.67      | 0.00    | -1.01    | -0.33    |

goalkeeper = GK, central back = CB, fullback = FB, midfielder = MID, wide midfielder = WM, attacking  
midfielder = AM, second striker = SS, external strikers = ES, and striker - CF

**Table S10.** LLST differences. Only statistically significant differences are reported.

| group1 | group2 | difference | p-value | CI lower | CI upper |
|--------|--------|------------|---------|----------|----------|
| AM     | CB     | 1.6907     | 0.001   | 0.873    | 2.5084   |
| AM     | ES     | -1.2293    | 0.001   | -2.1233  | -0.3352  |
| AM     | GK     | 2.146      | 0.001   | 1.2696   | 3.0223   |
| AM     | CF     | 1.86       | 0.00    | 0.97     | 2.74     |
| CB     | ES     | -2.92      | 0.00    | -3.68    | -2.16    |
| CB     | FB     | -1.62      | 0.00    | -2.31    | -0.92    |
| CB     | MID    | -1.89      | 0.00    | -2.70    | -1.08    |
| CB     | SS     | -2.29      | 0.00    | -3.15    | -1.44    |
| CB     | WM     | -1.48      | 0.00    | -2.19    | -0.77    |
| ES     | FB     | 1.30       | 0.00    | 0.52     | 2.09     |
| ES     | GK     | 3.38       | 0.00    | 2.55     | 4.20     |
| ES     | MID    | 1.03       | 0.01    | 0.14     | 1.92     |
| ES     | CF     | 3.09       | 0.00    | 2.25     | 3.92     |
| ES     | WM     | 1.44       | 0.00    | 0.64     | 2.24     |
| FB     | GK     | 2.07       | 0.00    | 1.31     | 2.83     |
| FB     | CF     | 1.78       | 0.00    | 1.01     | 2.56     |
| GK     | MID    | -2.34      | 0.00    | -3.21    | -1.47    |
| GK     | SS     | -2.75      | 0.00    | -3.66    | -1.84    |
| GK     | WM     | -1.93      | 0.00    | -2.71    | -1.15    |
| MID    | CF     | 2.05       | 0.00    | 1.17     | 2.94     |
| SS     | CF     | 2.46       | 0.00    | 1.54     | 3.38     |
| CF     | WM     | -1.65      | 0.00    | -2.44    | -0.85    |

goalkeeper = GK, central back = CB, fullback = FB, midfielder = MID, wide midfielder = WM, attacking  
midfielder = AM, second striker = SS, external strikers = ES, and striker - CF
